# Supplementary material for: The Pattern of RNA Editing Changes in Pleural Mesothelioma upon Epithelial-Mesenchymal Transition
Source: MDPI journal article supplement (doi:10.3390/ijms24032874), 2023-02-02
Supplement: s1 [file s1]

A

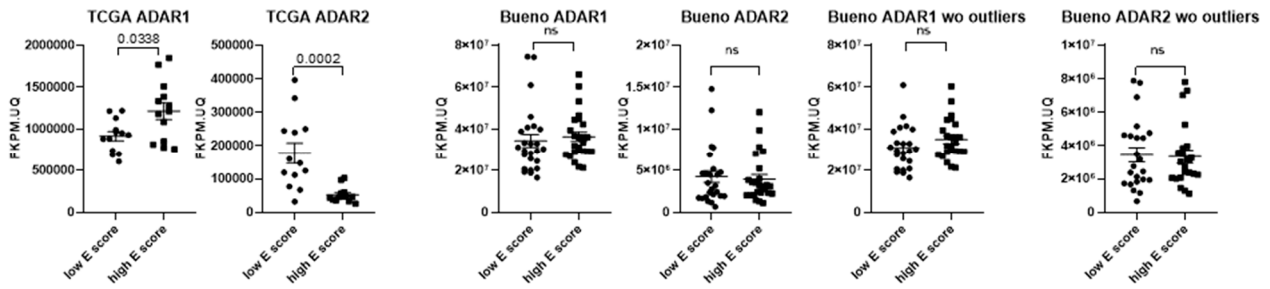

B

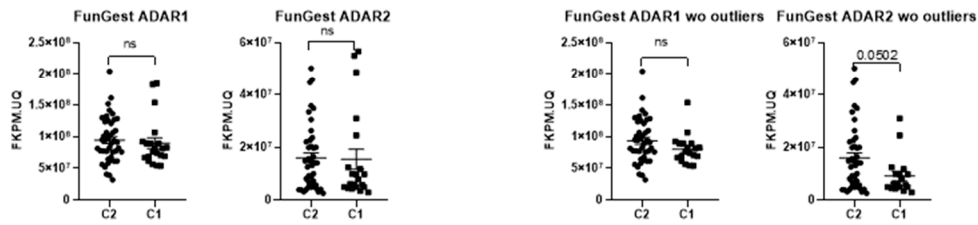

Figure S1. Differential expression of ADAR1 and ADAR2 in low vs high E-score PM (A) and C1 vs C2 primary mesothelioma cultures (B). The interquartile range method was applied to detect outliers. Mann-Whitney test. Error bars indicate SEM.
