# Supplementary material for: The Pattern of RNA Editing Changes in Pleural Mesothelioma upon Epithelial-Mesenchymal Transition
Source: Int J Mol Sci. 2023 Feb 2;24(3):2874. doi: 10.3390/ijms24032874 (PMC9917482; doi:10.3390/ijms24032874)
Supplement: Supplementary file 1 [file ijms-24-02874-s001.zip › Table S1 statistics editing clusters 1,2,3 vs 4,5,6 TCGA, Bueno, FunGest.xlsx]

## Sheet: readme
Supplementary Table 1: comparison of RNA editing in introns, 5 Kb downstream of gene and 3'UTR in RNA editing clusters 1,2,3 vs clusters 4,5,6 in Bueno, TCGA and FunGest datasets

## Sheet: Bueno
Table Analyzed	intron % patterns Bueno cl 1,2,3 vs 4,5,6				Table Analyzed	5 kb downstream % patterns Bueno cl 1,2,3 vs 4,5,6					Table Analyzed	3 UTR % patterns Bueno cl 1,2,3 vs 4,5,6
Column B	Cluster 4,5,6				Column B	Cluster 4,5,6					Column B	Cluster 4,5,6
vs.	vs.				vs.	vs.					vs.	vs.
Column A	Cluster 1,2,3				Column A	Cluster 1,2,3					Column A	Cluster 1,2,3
Mann Whitney test					Mann Whitney test						Mann Whitney test
P value	<0.0001				P value	<0.0001					P value	<0.0001
Exact or approximate P value?	Exact				Exact or approximate P value?	Exact					Exact or approximate P value?	Exact
P value summary	****				P value summary	****					P value summary	****
Significantly different (P < 0.05)?	Yes				Significantly different (P < 0.05)?	Yes					Significantly different (P < 0.05)?	Yes
One- or two-tailed P value?	Two-tailed				One- or two-tailed P value?	Two-tailed					One- or two-tailed P value?	Two-tailed

## Sheet: TCGA
Table Analyzed	intron % patterns tcga cl 1,2,3 vs 4,5,6				Table Analyzed	5k downstream % patterns tcga cl 1,2,3 vs 4,5,6					Table Analyzed	3 UTR % patterns tcga cl 1,2,3 vs 4,5,6
Column B	Cluster 4,5,6				Column B	Cluster 4,5,6					Column B	Cluster 4,5,6
vs.	vs.				vs.	vs.					vs.	vs.
Column A	Cluster 1,2,3				Column A	Cluster 1,2,3					Column A	Cluster 1,2,3
Mann Whitney test					Mann Whitney test						Mann Whitney test
P value	<0.0001				P value	<0.0001					P value	<0.0001
Exact or approximate P value?	Exact				Exact or approximate P value?	Exact					Exact or approximate P value?	Exact
P value summary	****				P value summary	****					P value summary	****
Significantly different (P < 0.05)?	Yes				Significantly different (P < 0.05)?	Yes					Significantly different (P < 0.05)?	Yes
One- or two-tailed P value?	Two-tailed				One- or two-tailed P value?	Two-tailed					One- or two-tailed P value?	Two-tailed

## Sheet: FunGest
Table Analyzed	intron % patterns FunGest cl 1,2,3 vs 4,5,6				Table Analyzed	5 kb downstream % patterns FunGest cl 1,2,3 vs 4,5,6					Table Analyzed	3'UTR % patterns FunGest cl 1,2,3 vs 4,5,6
Column B	Cluster 4,5,6				Column B	Cluster 4,5,6					Column B	Cluster 4,5,6
vs.	vs.				vs.	vs.					vs.	vs.
Column A	Cluster 1,2,3				Column A	Cluster 1,2,3					Column A	Cluster 1,2,3
Mann Whitney test					Mann Whitney test						Mann Whitney test
P value	<0.0001				P value	<0.0001					P value	<0.0001
Exact or approximate P value?	Exact				Exact or approximate P value?	Exact					Exact or approximate P value?	Exact
P value summary	****				P value summary	****					P value summary	****
Significantly different (P < 0.05)?	Yes				Significantly different (P < 0.05)?	Yes					Significantly different (P < 0.05)?	Yes
One- or two-tailed P value?	Two-tailed				One- or two-tailed P value?	Two-tailed					One- or two-tailed P value?	Two-tailed
